# Supplementary material for: Evaluation of Aroma Characteristics of Dried Shrimp (Litopenaeus vannamei) Prepared by Five Different Procedures
Source: MDPI journal article supplement (doi:10.3390/foods11213532), 2022-11-06
Supplement: s1 [file s1]

**Table S1.** GC-MS analysis of samples with different drying methods.

| Volatile components                | RI <sup>1</sup> | ID <sup>2</sup> | CAS         | Formula                           | Odour description <sup>3</sup> | Concentration /(ng/g) <sup>4</sup> |                         |                         |                         |                         |                         |
|------------------------------------|-----------------|-----------------|-------------|-----------------------------------|--------------------------------|------------------------------------|-------------------------|-------------------------|-------------------------|-------------------------|-------------------------|
|                                    |                 |                 |             |                                   |                                | BS <sup>5,6</sup>                  | VFDS <sup>5,6</sup>     | VDS <sup>5,6</sup>      | HPDS <sup>5,6</sup>     | HADS <sup>5,6</sup>     | MVDS <sup>5,6</sup>     |
| Aldehydes                          |                 |                 |             |                                   |                                |                                    |                         |                         |                         |                         |                         |
| Benzaldehyde                       | 1489            | MS, RI          | 100-52-7    | C <sub>7</sub> H <sub>6</sub> O   | Bitter, almond                 | 2.78±0.15 <sup>e</sup>             | 11.45±0.79 <sup>d</sup> | 20.50±1.71 <sup>c</sup> | 35.01±0.30 <sup>a</sup> | 28.80±1.84 <sup>b</sup> | 18.93±1.68 <sup>c</sup> |
| Pentanal                           | 981             | MS, RI          | 110-62-3    | C <sub>5</sub> H <sub>10</sub> O  | Fruity                         | 0.87±0.03 <sup>b</sup>             | ND                      | 1.02±0.11 <sup>b</sup>  | 6.84±0.90 <sup>a</sup>  | ND                      | ND                      |
| 3-Methylbutanal                    | 936             | MS, RI          | 590-86-3    | C <sub>5</sub> H <sub>10</sub> O  | Chocolate, coffee              | ND                                 | ND                      | 1.21±0.15 <sup>b</sup>  | 5.93±1.16 <sup>b</sup>  | 25.52±5.87 <sup>a</sup> | 26.30±2.08 <sup>a</sup> |
| Hexanal                            | 1070            | MS, RI          | 66-25-1     | C <sub>6</sub> H <sub>12</sub> O  | Grassy, creamy                 | 2.46±0.02 <sup>c</sup>             | 3.63±0.59 <sup>c</sup>  | 7.87±0.38 <sup>b</sup>  | 7.09±0.09 <sup>b</sup>  | 6.55±0.25 <sup>b</sup>  | 10.13±0.91 <sup>a</sup> |
| Heptanal                           | 1168            | MS, RI          | 111-71-7    | C <sub>7</sub> H <sub>14</sub> O  | Fishy                          | 0.93±0.05 <sup>c</sup>             | ND                      | 2.17±0.01 <sup>bc</sup> | 6.64±0.34 <sup>a</sup>  | 3.73±0.91 <sup>b</sup>  | ND                      |
| Octanal                            | 1278            | MS, RI          | 124-13-0    | C <sub>8</sub> H <sub>16</sub> O  | Fatty, fruity                  | 0.83±0.08 <sup>c</sup>             | 1.58±0.18 <sup>bc</sup> | 1.02±0.06 <sup>c</sup>  | 5.88±0.01 <sup>a</sup>  | 2.56±0.01 <sup>b</sup>  | 4.78±0.88 <sup>a</sup>  |
| Nonanal                            | 1380            | MS, RI          | 124-19-6    | C <sub>9</sub> H <sub>18</sub> O  | Rose, fat                      | 5.77±0.16 <sup>b</sup>             | 3.80±0.16 <sup>b</sup>  | 7.26±0.23 <sup>b</sup>  | 31.14±2.42 <sup>a</sup> | ND                      | ND                      |
| (E, Z)-2,6-nonadienal              | 1567            | MS, RI          | 557-48-2    | C <sub>9</sub> H <sub>14</sub> O  | Waxy, grassy                   | ND                                 | ND                      | ND                      | 1.02±0.07               | ND                      | ND                      |
| Decanal                            | 1484            | MS, RI          | 112-31-2    | C <sub>10</sub> H <sub>20</sub> O | Orange peel                    | 1.88±0.52                          | 1.07±0.32               | ND                      | ND                      | ND                      | ND                      |
| (E)-4-Decenal                      | 1530            | MS, RI          | 65405-70-1  | C <sub>10</sub> H <sub>18</sub> O | Green ,fatty                   | ND                                 | ND                      | ND                      | 4.82±0.79               | ND                      | ND                      |
| Undecanal                          | 1594            | MS              | 112-44-7    | C <sub>11</sub> H <sub>22</sub> O | Strong fatty                   | ND                                 | ND                      | ND                      | 1.90±0.71               | ND                      | ND                      |
| Tetradecanal                       | 1924            | MS              | 124-25-4    | C <sub>14</sub> H <sub>28</sub> O | Fatty,fishy                    | ND                                 | ND                      | ND                      | ND                      | ND                      | 0.30±0.04               |
| Pentadecanal                       | 2023            | MS              | 2765-11-9   | C <sub>15</sub> H <sub>30</sub> O | Fresh waxy                     | ND                                 | ND                      | ND                      | 2.25±0.32 <sup>a</sup>  | 0.34±0.03 <sup>b</sup>  | 0.11±0.01 <sup>b</sup>  |
| Hexadecanal                        | 2130            | MS              | 629-80-1    | C <sub>16</sub> H <sub>32</sub> O | Cardboard                      | ND                                 | ND                      | ND                      | 1.00±0.17               | 0.51±0.03               | ND                      |
| cis,cis-7,10,-hexadecadienal       | 1821            | MS              | 56829-23-3  | C <sub>16</sub> H <sub>28</sub> O | NE                             | 0.20±0.03 <sup>cd</sup>            | 0.20±0.06 <sup>cd</sup> | 1.16±0.18 <sup>bc</sup> | 2.84±0.83 <sup>a</sup>  | 1.42±0.01 <sup>b</sup>  | 0.14±0.01 <sup>d</sup>  |
| Ketones                            |                 |                 |             |                                   |                                |                                    |                         |                         |                         |                         |                         |
| Acetophenone                       | 1615            | MS              | 98-86-2     | C <sub>8</sub> H <sub>8</sub> O   | Sweet                          | ND                                 | ND                      | ND                      | ND                      | 2.27±0.22               | 1.90±0.57               |
| 2-Heptanone                        | 1171            | MS, RI          | 110-43-0    | C <sub>7</sub> H <sub>14</sub> O  | Musty, peardrops, soapy        | 1.68±0.17 <sup>b</sup>             | 3.17±0.07 <sup>ab</sup> | 3.66±0.40 <sup>ab</sup> | 3.49±0.48 <sup>ab</sup> | 5.25±1.12 <sup>a</sup>  | ND                      |
| 6-Methyl-2-heptanone               | 1226            | MS              | 928-68-7    | C <sub>8</sub> H <sub>16</sub> O  | Camphoreous                    | ND                                 | ND                      | ND                      | ND                      | 0.55±0.20               | 0.43±0.02               |
| 6-Methyl-5-hepten-2-one            | 1323            | MS, RI          | 110-93-0    | C <sub>8</sub> H <sub>14</sub> O  | Sweet, fruity                  | 0.90±0.08 <sup>a</sup>             | 0.88±0.02 <sup>a</sup>  | 1.53±0.37 <sup>a</sup>  | 1.40±0.20 <sup>a</sup>  | ND                      | ND                      |
| 2-Octanone                         | 1273            | MS, RI          | 111-13-7    | C <sub>8</sub> H <sub>16</sub> O  | Soapy, floral                  | ND                                 | 1.15±0.14 <sup>ab</sup> | 0.54±0.09 <sup>d</sup>  | 0.87±0.10 <sup>bc</sup> | 1.41±0.08 <sup>a</sup>  | 0.83±0.09 <sup>cd</sup> |
| 2-Nonanone                         | 1377            | MS, RI          | 821-55-6    | C <sub>9</sub> H <sub>18</sub> O  | Creamy, fruity                 | 1.52±0.16 <sup>bc</sup>            | ND                      | 11.47±2.65 <sup>a</sup> | 1.25±0.08 <sup>c</sup>  | 1.71±0.22 <sup>bc</sup> | 5.66±0.07 <sup>b</sup>  |
| 2-Decanone                         | 1479            | MS, RI          | 693-54-9    | C <sub>10</sub> H <sub>20</sub> O | Fruity                         | ND                                 | ND                      | 0.72±0.25 <sup>c</sup>  | ND                      | 3.22±0.17 <sup>a</sup>  | 1.75±0.18 <sup>b</sup>  |
| 2-Undecanone                       | 1589            | MS, RI          | 112-12-9    | C <sub>11</sub> H <sub>22</sub> O | Green, musty                   | 0.20±0.05 <sup>d</sup>             | 0.46±0.10 <sup>bc</sup> | 0.53±0.01 <sup>bc</sup> | 1.15±0.08 <sup>a</sup>  | 0.41±0.04 <sup>cd</sup> | 0.66±0.05 <sup>b</sup>  |
| (Z)-6-Undecen-2-one                | 1612            | MS              | 107853-70-3 | C <sub>11</sub> H <sub>20</sub> O | Rose                           | ND                                 | 0.75±0.17               | 4.52±0.18               | ND                      | ND                      | ND                      |
| 6,10-Dimethyl-5,9-undecadien-2-one | 1841            | MS              | 689-67-8    | C <sub>13</sub> H <sub>22</sub> O | Rose ,fruity                   | 0.99 <sup>cd</sup>                 | 0.56±0.07 <sup>d</sup>  | 1.64±0.04 <sup>b</sup>  | 2.18±0.35 <sup>a</sup>  | 1.22±0.08 <sup>bc</sup> | 1.18±0.01 <sup>bc</sup> |
| Alcohols                           |                 |                 |             |                                   |                                |                                    |                         |                         |                         |                         |                         |
| 1-Pentanol                         | 1241            | MS              | 71-41-0     | C <sub>5</sub> H <sub>12</sub> O  | Green; wax                     | 1.12±0.13 <sup>b</sup>             | 3.21±0.97 <sup>a</sup>  | 3.95±0.56 <sup>a</sup>  | ND                      | 2.36±0.73 <sup>ab</sup> | ND                      |
| 1-Penten-3-ol                      | 1152            | MS, RI          | 616-25-1    | C <sub>5</sub> H <sub>10</sub> O  | Burnt, meaty                   | ND                                 | ND                      | 4.24±0.02               | ND                      | 1.56±0.04               | ND                      |
| 1-Hexanol                          | 1342            | MS              | 111-27-3    | C <sub>6</sub> H <sub>14</sub> O  | Green, grassy                  | ND                                 | ND                      | ND                      | 1.34±0.09               | ND                      | ND                      |
| 2-Ethyl-1-hexanol                  | 1497            | MS              | 104-76-7    | C <sub>8</sub> H <sub>18</sub> O  | Herbal, carrots                | 0.79±0.04 <sup>d</sup>             | 1.27±0.32 <sup>bc</sup> | ND                      | 4.27±0.13 <sup>a</sup>  | 1.42±0.23 <sup>b</sup>  | ND                      |

|                                         |      |        |            |                                                 |                        |                        |                         |                          |                         |                         |                         |
|-----------------------------------------|------|--------|------------|-------------------------------------------------|------------------------|------------------------|-------------------------|--------------------------|-------------------------|-------------------------|-------------------------|
| 1-Hexen-3-ol                            | 1148 | MS     | 4798-44-1  | C <sub>6</sub> H <sub>12</sub> O                | Green, fruity, fatty   | ND                     | ND                      | ND                       | 2.37±0.18               | ND                      | ND                      |
| 2-Propyl-1-heptanol                     | 1661 | MS     | 10042-59-8 | C <sub>10</sub> H <sub>22</sub> O               | NE                     | ND                     | ND                      | ND                       | ND                      | 2.46±0.52               | ND                      |
| Octanol                                 | 1552 | MS, RI | 111-87-5   | C <sub>8</sub> H <sub>18</sub> O                | Fragrance, sweet       | 0.55±0.07 <sup>d</sup> | 0.88±0.08 <sup>cd</sup> | 1.72±0.18 <sup>bcd</sup> | 6.75±1.03 <sup>a</sup>  | 2.12±0.51 <sup>bc</sup> | 2.87±0.02 <sup>b</sup>  |
| 1-Octen-3-ol                            | 1438 | MS, RI | 3391-86-4  | C <sub>8</sub> H <sub>16</sub> O                | Mushroom, fishy        | 1.03±0.04 <sup>d</sup> | 1.85±0.28 <sup>d</sup>  | 5.34±0.08 <sup>c</sup>   | 10.41±0.96 <sup>b</sup> | 15.71±1.13 <sup>a</sup> | ND                      |
| 1-Nonanol                               | 1651 | MS, RI | 143-8-8    | C <sub>9</sub> H <sub>20</sub> O                | Dusty, oily            | 0.25±0.03 <sup>b</sup> | 0.19±0.04 <sup>b</sup>  | 2.08±0.64 <sup>a</sup>   | ND                      | 2.34±0.70 <sup>a</sup>  | 0.57±0.01 <sup>b</sup>  |
| 1-Decanol                               | 1752 | MS     | 112-30-1   | C <sub>10</sub> H <sub>22</sub> O               | Sweet,fruity           | ND                     | 1.44±0.73               | ND                       | 0.83±0.17               | ND                      | ND                      |
| 1-Undecanol                             | 1873 | MS     | 112-42-5   | C <sub>11</sub> H <sub>24</sub> O               | Rose ,fruity           | ND                     | 0.22±0.06 <sup>b</sup>  | 0.72±0.21 <sup>ab</sup>  | 0.94±0.17 <sup>ab</sup> | ND                      | 0.21±0.02 <sup>b</sup>  |
| <b>Esters</b>                           |      |        |            |                                                 |                        |                        |                         |                          |                         |                         |                         |
| Methyl 2-methyloctanoate                | 1385 | MS     | 2177-86-8  | C <sub>10</sub> H <sub>20</sub> O <sub>2</sub>  | NE                     | 1.90±0.34 <sup>a</sup> | 2.14±0.57 <sup>a</sup>  | 2.51±0.92 <sup>a</sup>   | ND                      | ND                      | 2.06±0.05 <sup>a</sup>  |
| Dibutyl phthalate                       | 1971 | MS     | 84-74-2    | C <sub>16</sub> H <sub>22</sub> O <sub>4</sub>  | Slightly toasted       | ND                     | 0.17±0.06 <sup>b</sup>  | ND                       | 7.64±0.51 <sup>a</sup>  | 0.15±0.03 <sup>b</sup>  | 0.12 <sup>b</sup>       |
| Dimethyl phthalate                      | 2261 | MS     | 131-11-3   | C <sub>10</sub> H <sub>10</sub> O <sub>4</sub>  | Odorless               | ND                     | ND                      | ND                       | 0.48±0.04               | 0.44±0.13               | ND                      |
| Caproic acid vinyl ester                | 1315 | MS     | 3050-69-9  | C <sub>8</sub> H <sub>14</sub> O <sub>2</sub>   | NE                     | 0.78±0.12 <sup>d</sup> | ND                      | 4.88±0.15 <sup>b</sup>   | 5.22±0.04 <sup>a</sup>  | 4.09±0.08 <sup>c</sup>  | 1.04±0.01 <sup>d</sup>  |
| Triethyl phosphate                      | 1636 | MS     | 78-40-0    | C <sub>6</sub> H <sub>15</sub> O <sub>4</sub> P | Mild cider             | ND                     | ND                      | ND                       | ND                      | 0.87±0.06               | ND                      |
| Hydrogen isocyanate                     | 1190 | MS     | 75-13-8    | CHNO                                            | NE                     | 0.44                   | 0.25±0.07               | ND                       | ND                      | ND                      | ND                      |
| <b>Pyrazines</b>                        |      |        |            |                                                 |                        |                        |                         |                          |                         |                         |                         |
| Pyrazine                                | 1192 | MS, RI | 290-37-9   | C <sub>4</sub> H <sub>4</sub> N <sub>2</sub>    | Roasted                | ND                     | ND                      | ND                       | ND                      | ND                      | 1.08±0.19               |
| 2-Methylpyrazine                        | 1243 | MS, RI | 109-08-0   | C <sub>5</sub> H <sub>6</sub> N <sub>2</sub>    | Nutty; cacao, roasted  | ND                     | 0.47±0.20 <sup>c</sup>  | 4.82±1.76 <sup>ab</sup>  | ND                      | 6.78±0.03 <sup>a</sup>  | 2.85±0.05 <sup>bc</sup> |
| 2,3-Dimethylpyrazine                    | 1324 | MS, RI | 5910-89-4  | C <sub>6</sub> H <sub>8</sub> N <sub>2</sub>    | Nutty, coffee,roasted  | ND                     | ND                      | ND                       | ND                      | 2.05±0.11               | 1.82±0.15               |
| 2,5-Dimethylpyrazine                    | 1299 | MS, RI | 123-32-0   | C <sub>6</sub> H <sub>8</sub> N <sub>2</sub>    | Nutty, roasted         | 1.02±0.08 <sup>d</sup> | 3.12±0.40 <sup>d</sup>  | 8.37±0.20 <sup>c</sup>   | 7.34±1.03 <sup>c</sup>  | 30.83±0.77 <sup>a</sup> | 14.54±1.42 <sup>b</sup> |
| 2,6-Dimethylpyrazine                    | 1306 | MS, RI | 108-50-9   | C <sub>6</sub> H <sub>8</sub> N <sub>2</sub>    | Nutty,roasted          | ND                     | 1.04±0.15 <sup>c</sup>  | 2.47±0.17 <sup>b</sup>   | ND                      | 5.20±0.20 <sup>a</sup>  | 2.81±0.62 <sup>b</sup>  |
| 2-Ethyl-5-methylpyrazine                | 1370 | MS, RI | 13360-64-0 | C <sub>7</sub> H <sub>10</sub> N <sub>2</sub>   | Smoky, burnt           | ND                     | ND                      | 1.06±0.07 <sup>b</sup>   | 0.78±0.14 <sup>b</sup>  | 12.64±0.68 <sup>a</sup> | 11.21±0.18 <sup>a</sup> |
| 2-Ethyl-6-methylpyrazine                | 1365 | MS, RI | 13925-03-6 | C <sub>7</sub> H <sub>10</sub> N <sub>2</sub>   | Roasted potato         | ND                     | ND                      | 1.00±0.14 <sup>bc</sup>  | 0.59±0.23 <sup>c</sup>  | 2.59±0.25 <sup>a</sup>  | 1.58±0.12 <sup>b</sup>  |
| 2,6-Diethylpyrazine                     | 1414 | MS     | 13067-27-1 | C <sub>8</sub> H <sub>12</sub> N <sub>2</sub>   | Nutty                  | ND                     | ND                      | ND                       | ND                      | 0.43±0.07               | ND                      |
| 2-Acetyl-3-methylpyrazine               | 1595 | MS     | 23787-80-6 | C <sub>7</sub> H <sub>8</sub> N <sub>2</sub> O  | Nutty ,roasted         | ND                     | 0.69±0.18 <sup>b</sup>  | ND                       | ND                      | 1.99±0.05 <sup>a</sup>  | 1.40±0.28 <sup>ab</sup> |
| 2-ethenyl-6-methyl-Pyrazine             | 1461 | MS     | 13925-09-2 | C <sub>7</sub> H <sub>8</sub> N <sub>2</sub>    | Hazelnut               | ND                     | ND                      | ND                       | ND                      | 2.08±0.15               | 0.97±0.24               |
| 3-Ethyl-2,5-dimethylpyrazine            | 1424 | MS, RI | 13360-65-1 | C <sub>8</sub> H <sub>12</sub> N <sub>2</sub>   | Roasted, smoky         | ND                     | 0.95±0.05 <sup>b</sup>  | 2.62±0.15 <sup>b</sup>   | 1.92±0.01 <sup>b</sup>  | 29.83±2.01 <sup>a</sup> | 28.11±0.43 <sup>a</sup> |
| 2-Ethyl-3,5-dimethylpyrazine            | 1439 | MS, RI | 13925-07-0 | C <sub>8</sub> H <sub>12</sub> N <sub>2</sub>   | Roasted aroma          | ND                     | ND                      | ND                       | ND                      | 15.96±1.92              | 17.66±1.42              |
| 2-Acetyl-3,5-dimethylpyrazine           | 1648 | MS     | 54300-08-2 | C <sub>8</sub> H <sub>10</sub> N <sub>2</sub> O | Nutty,roasted,hazelnut | ND                     | ND                      | ND                       | ND                      | ND                      | 0.16±0.06               |
| 3,5-Diethyl-2-methylpyrazine            | 1474 | MS, RI | 18138-05-1 | C <sub>9</sub> H <sub>14</sub> N <sub>2</sub>   | Nutty,meaty,vegetable  | ND                     | ND                      | ND                       | ND                      | 4.63±0.17               | 3.22±0.27               |
| 2,3,5-Trimethylpyrazine                 | 1383 | MS, RI | 14667-55-1 | C <sub>7</sub> H <sub>10</sub> N <sub>2</sub>   | Nutty, caramel         | ND                     | ND                      | ND                       | ND                      | 44.72±1.25              | 25.56±2.41              |
| 2,3,5,6-Tetramethylpyrazine             | 1450 | MS     | 1124-11-4  | C <sub>8</sub> H <sub>12</sub> N <sub>2</sub>   | Nutty, musty ,coffee   | ND                     | ND                      | ND                       | ND                      | 2.44±0.07               | 3.73±0.88               |
| 2,5-Dimethyl-3-(3-methylbutyl)-pyrazine | 1644 | MS     | 18433-98-2 | C <sub>11</sub> H <sub>18</sub> N <sub>2</sub>  | Fruity                 | ND                     | ND                      | ND                       | ND                      | 2.40±0.07               | 2.98±0.25               |
| 2,3,5-Trimethyl-6-ethylpyrazine         | 1494 | MS     | 17398-16-2 | C <sub>9</sub> H <sub>14</sub> N <sub>2</sub>   | Nutty                  | ND                     | ND                      | ND                       | ND                      | 2.75±0.18               | ND                      |

|                                          |          |            |            |                                                |                           |                         |                         |                         |                         |                         |                         |
|------------------------------------------|----------|------------|------------|------------------------------------------------|---------------------------|-------------------------|-------------------------|-------------------------|-------------------------|-------------------------|-------------------------|
| 2,5-Dimethyl-3-(2-methylpropyl)-pyrazine | 151<br>1 | MS         | 32736-94-0 | C <sub>10</sub> H <sub>16</sub> N <sub>2</sub> | Nutty                     | ND                      | ND                      | ND                      | ND                      | ND                      | 0.45±0.14               |
| <b>Hydrocarbons</b>                      |          |            |            |                                                |                           |                         |                         |                         |                         |                         |                         |
| Styrene                                  | 123<br>8 | MS         | 100-42-5   | C <sub>8</sub> H <sub>8</sub>                  | Sweet balsam              | ND                      | ND                      | ND                      | ND                      | 2.73±0.60               | 1.97±0.23               |
| 3,5,5-Trimethyl-2-hexene                 | 147<br>1 | MS         | 26456-76-8 | C <sub>9</sub> H <sub>18</sub>                 | NE                        | 1.05±0.09 <sup>d</sup>  | 0.57±0.06 <sup>e</sup>  | 1.80±0.21 <sup>c</sup>  | 5.05±0.09 <sup>a</sup>  | 2.67±0.14 <sup>b</sup>  | 0.45±0.05 <sup>e</sup>  |
| 1,3,5,7-Cyclooctatetraene                | 123<br>4 | MS         | 629-20-9   | C <sub>8</sub> H <sub>8</sub>                  | NE                        | 0.43±0.16               | 8.27±0.73               | ND                      | ND                      | ND                      | ND                      |
| 1-Decene                                 | 103<br>6 | MS         | 872-5-9    | C <sub>10</sub> H <sub>20</sub>                | NE                        | ND                      | 1.56±0.16               | ND                      | ND                      | ND                      | 1.68±0.28               |
| Naphthalene                              | 170<br>1 | MS         | 91-20-3    | C <sub>10</sub> H <sub>8</sub>                 | Tar                       | 1.23±0.35 <sup>a</sup>  | 0.36±0.01 <sup>b</sup>  | 1.64±0.05 <sup>a</sup>  | ND                      | ND                      | 0.60±0.07 <sup>b</sup>  |
| (3E,5Z)-1,3,5-Undecatriene               | 196<br>8 | MS         | 19883-29-5 | C <sub>11</sub> H <sub>18</sub>                | NE                        | ND                      | 0.39±0.07 <sup>c</sup>  | ND                      | 1.38±0.04 <sup>a</sup>  | 0.85±0.02 <sup>b</sup>  | ND                      |
| 1-Tridecene                              | 125<br>0 | MS         | 2437-56-1  | C <sub>13</sub> H <sub>26</sub>                | NE                        | ND                      | 0.69 <sup>b</sup>       | 1.02±0.20 <sup>ab</sup> | 1.19±0.07 <sup>a</sup>  | ND                      | ND                      |
| a-Farnesene                              | 172<br>4 | MS         | 502-61-4   | C <sub>15</sub> H <sub>24</sub>                | Herbal                    | 0.96±0.03 <sup>b</sup>  | 1.84±0.08 <sup>a</sup>  | ND                      | 1.65±0.23 <sup>a</sup>  | 0.33±0.12 <sup>c</sup>  | 0.56±0.13 <sup>bc</sup> |
| Butylated hydroxytoluene                 | 189<br>9 | MS         | 128-37-0   | C <sub>15</sub> H <sub>24</sub> O              | Camphor                   | ND                      | 0.42±0.03 <sup>b</sup>  | ND                      | 1.10±0.15 <sup>a</sup>  | 0.23±0.01 <sup>b</sup>  | 0.24±0.12 <sup>b</sup>  |
| 2,4-Di-tert-butylphenol                  | 229<br>0 | MS         | 96-76-4    | C <sub>14</sub> H <sub>22</sub> O              | Waxy floral aroma         | ND                      | ND                      | ND                      | 1.12±0.09 <sup>a</sup>  | 0.80±0.08 <sup>a</sup>  | 0.31±0.12 <sup>b</sup>  |
| Nonylcyclopropane                        | 125<br>0 | MS         | 74663-85-7 | C <sub>12</sub> H <sub>24</sub>                | NE                        | ND                      | 1.09±0.14 <sup>b</sup>  | 1.44±0.09 <sup>a</sup>  | ND                      | ND                      | 0.37±0.03 <sup>c</sup>  |
| Nonylcyclopentane                        | 128<br>7 | MS         | 2882-98-6  | C <sub>14</sub> H <sub>28</sub>                | NE                        | ND                      | 0.33±0.02 <sup>b</sup>  | 0.35±0.03 <sup>b</sup>  | 0.61±0.10 <sup>ab</sup> | 0.89±0.27 <sup>a</sup>  | ND                      |
| 3-Methylnonane                           | 980      | MS         | 5911-04-6  | C <sub>10</sub> H <sub>22</sub>                | NE                        | ND                      | 3.18±0.66               | ND                      | ND                      | ND                      | 4.81±0.01               |
| Undecane                                 | 109<br>8 | MS         | 1120-21-4  | C <sub>11</sub> H <sub>24</sub>                | NE                        | 11.42±2.89 <sup>a</sup> | 5.86±0.02 <sup>bc</sup> | 2.35±1.09 <sup>c</sup>  | 8.50±1.03 <sup>ab</sup> | 4.68±1.15 <sup>bc</sup> | 2.62±0.38 <sup>c</sup>  |
| 3-Methylundecane                         | 117<br>9 | MS<br>, RI | 1002-43-3  | C <sub>12</sub> H <sub>26</sub>                | NE                        | ND                      | 4.21±0.15 <sup>b</sup>  | 5.40±0.02 <sup>a</sup>  | 2.64±0.34 <sup>c</sup>  | 5.08±0.35 <sup>ab</sup> | 2.07±0.42 <sup>c</sup>  |
| Dodecane                                 | 121<br>2 | MS<br>, RI | 112-40-3   | C <sub>12</sub> H <sub>26</sub>                | Popcorn-like aroma        | 0.77±0.14 <sup>b</sup>  | 8.13±1.04 <sup>a</sup>  | 9.18±0.62 <sup>a</sup>  | 9.90±1.35 <sup>a</sup>  | 8.72±0.99 <sup>a</sup>  | 7.96±0.75 <sup>a</sup>  |
| Tridecane                                | 130<br>0 | MS         | 629-50-5   | C <sub>13</sub> H <sub>28</sub>                | NE                        | ND                      | 4.01±0.28               | ND                      | ND                      | 2.69±0.15               | 2.87±0.48               |
| 2,6,10-Trimethyltridecane                | 145<br>3 | MS         | 3891-99-4  | C <sub>16</sub> H <sub>34</sub>                | NE                        | 1.79±0.13 <sup>b</sup>  | 1.29 <sup>b</sup>       | 3.07±0.28 <sup>ab</sup> | 4.61±0.96 <sup>a</sup>  | 2.71±0.57 <sup>ab</sup> | 2.73±0.64 <sup>ab</sup> |
| Tetradecane                              | 141<br>1 | MS<br>, RI | 629-59-4   | C <sub>14</sub> H <sub>30</sub>                | Mild waxy                 | 1.00±0.02 <sup>c</sup>  | 2.49±0.21 <sup>b</sup>  | 2.70±0.28 <sup>b</sup>  | 5.82±0.72 <sup>a</sup>  | 3.01±0.04 <sup>b</sup>  | 2.64±0.27 <sup>b</sup>  |
| <b>Heterocycles</b>                      |          |            |            |                                                |                           |                         |                         |                         |                         |                         |                         |
| 2-Pentylfuran                            | 121<br>9 | MS<br>, RI | 3777-69-3  | C <sub>9</sub> H <sub>14</sub> O               | Fruity,beany,metallic     | 0.44±0.02 <sup>c</sup>  | 1.22±0.07 <sup>b</sup>  | 2.51±0.24 <sup>a</sup>  | 2.69±0.18 <sup>a</sup>  | 3.01±0.33 <sup>a</sup>  | 0.54±0.06 <sup>c</sup>  |
| 5H-1-Pyridine                            | 239<br>8 | MS         | 270-91-7   | C <sub>8</sub> H <sub>7</sub> N                | NE                        | 1.93±0.58               | ND                      | ND                      | 0.21±0.08               | ND                      | ND                      |
| 2-Pyrrolidinone                          | 197<br>8 | MS         | 616-45-5   | C <sub>4</sub> H <sub>7</sub> NO               | NE                        | ND                      | ND                      | ND                      | 0.34±0.04               | 0.25±0.02               |                         |
| 2-Acetylpyrrole                          | 193<br>3 | MS<br>, RI | 1072-83-9  | C <sub>6</sub> H <sub>7</sub> NO               | Toasted, boullion         | ND                      | ND                      | ND                      | ND                      | 0.28±0.04               | 0.78±0.04               |
| 2-Isopropyl-4,5-dimethylthiazole         | 143<br>1 | MS         | 53498-30-9 | C <sub>8</sub> H <sub>13</sub> NS              | NE                        | ND                      | ND                      | ND                      | ND                      | ND                      | 0.83±0.06               |
| <b>Acids</b>                             |          |            |            |                                                |                           |                         |                         |                         |                         |                         |                         |
| Benzoic acid                             | 239<br>8 | MS         | 65-85-0    | C <sub>7</sub> H <sub>6</sub> O <sub>2</sub>   | Faint balsam, urine       | ND                      | ND                      | ND                      | ND                      | 0.24±0.10               | ND                      |
| Acetic acid                              | 142<br>7 | MS<br>, RI | 64-19-7    | C <sub>2</sub> H <sub>4</sub> O <sub>2</sub>   | Vinegar-like              | 0.64±0.07 <sup>d</sup>  | 1.62±0.04 <sup>b</sup>  | 1.56±0.05 <sup>b</sup>  | 2.05±0.05 <sup>a</sup>  | 1.81±0.11 <sup>ab</sup> | 1.03±0.18 <sup>c</sup>  |
| Octanoic acid                            | 203<br>7 | MS<br>, RI | 124-7-2    | C <sub>8</sub> H <sub>16</sub> O <sub>2</sub>  | NE                        | ND                      | 0.44±0.07               | ND                      | ND                      | ND                      | ND                      |
| Decanoic acid                            | 225<br>2 | MS<br>, RI | 334-48-5   | C <sub>10</sub> H <sub>20</sub> O <sub>2</sub> | Unpleasant rancid, fatty, | ND                      | ND                      | 0.22±0.09 <sup>a</sup>  | 0.37±0.07 <sup>a</sup>  | 0.27±0.12 <sup>a</sup>  | ND                      |
| Dodecanoic acid                          | 246<br>4 | MS<br>, RI | 143-7-7    | C <sub>12</sub> H <sub>24</sub> O <sub>2</sub> | NE                        | 0.32±0.04               | 0.45±0.13               | 0.53±0.13               | 0.29±0.05               | ND                      | ND                      |
| Tetradecanoic acid                       | 267<br>5 | MS         | 544-63-8   | C <sub>14</sub> H <sub>28</sub> O <sub>2</sub> | Waxy, fatty               | 0.88±0.04 <sup>ab</sup> | 1.11±0.18 <sup>a</sup>  | ND                      | ND                      | 0.64±0.04 <sup>bc</sup> | 0.37±0.10 <sup>c</sup>  |

|                         |          |            |               |                                                |                |                        |                         |                         |                         |                         |                          |
|-------------------------|----------|------------|---------------|------------------------------------------------|----------------|------------------------|-------------------------|-------------------------|-------------------------|-------------------------|--------------------------|
| Pentadecylic acid       | 278<br>0 | MS         | 1002-<br>84-2 | C <sub>15</sub> H <sub>30</sub> O <sub>2</sub> | Waxy           | 0.83±0.02 <sup>b</sup> | ND                      | 1.27±0.06 <sup>a</sup>  | ND                      | 0.22±0.04 <sup>d</sup>  | 0.42±0.01 <sup>c</sup>   |
| <b>Amines</b>           |          |            |               |                                                |                |                        |                         |                         |                         |                         |                          |
| Trimethylamine          | 656      | MS<br>, RI | 75-50-3       | C <sub>3</sub> H <sub>9</sub> N                | Fishy, ammonia | 9.21±0.62 <sup>d</sup> | 57.79±0.19 <sub>c</sub> | 88.37±3.99 <sup>b</sup> | 56.53±6.12 <sub>c</sub> | 80.44±7.85 <sub>b</sub> | 112.37±8.45 <sub>a</sub> |
| 3-Methyl-<br>butanamide | 187<br>7 | MS         | 541-46-<br>8  | C <sub>5</sub> H <sub>11</sub> NO              | NE             | ND                     | ND                      | ND                      | 0.65±0.15               | ND                      | ND                       |
| Succinimide             | 241<br>1 | MS         | 123-56-<br>8  | C <sub>4</sub> H <sub>5</sub> NO <sub>2</sub>  | NE             | 0.84±0.06 <sup>a</sup> | ND                      | 0.37±0.16 <sup>b</sup>  | 0.24±0.05 <sup>b</sup>  | 0.14±0.04 <sup>b</sup>  | ND                       |
| Acetamide               | 171<br>9 | MS         | 60-35-5       | C <sub>2</sub> H <sub>5</sub> NO               | Bland          | ND                     | ND                      | ND                      | ND                      | 0.81±0.11               | 0.15±0.03                |

<sup>1</sup> RI:Linear Retention Index, calculates the retention index of a compound on an InertCap® Pure-WAX column based on the retention time of n-alkanes (C6-C28) on the instrument.

<sup>2</sup> Identification approach. MS: mass spectrum; RI: retention index.

<sup>3</sup> Reference reports [1,2] and web databases(<http://www.odour.org.uk>, <http://www.flavornet.org>); NE: not estimated.

<sup>4</sup> The concentration of volatile compounds is expressed as the mean ± standard deviation (Mean ± SD) of triplicate samples; Different letters within a row indicate significant differences (p < 0.05)

<sup>5</sup> Different letters in the same row indicate significant differences between samples (P < 0.05); ND:not detected.

<sup>6</sup> BS: blanching shrimp; VFDS: vacuum freeze-dried shrimp; VDS: vacuum-dried shrimp; HPDS: heat pump-dried shrimp; HADS: hot air-dried shrimp; MVDS: microwave vacuum-dried shrimp.

1. Yu, J.; Lu, K.; Zi, W.J.; Yang, X.H.; Xie, W.C. Characterization of aroma profiles and aroma-active compounds in high-salt and low-salt shrimp paste by molecular sensory science. *Food Biosci.* **2022**, *45*, 101470.
2. Zhu, Y.; Xiaoting Chen, X.T.; Pan, N.; Liu, S.J.; Su, Y.C.; Xiao, M.T.; Shi, W.Z.; Liu, Z.Y. The Effects of Five Different Drying Methods on the Quality of Semi-Dried Takifugu Obscurus Fillets. *LWT Food Sci. Technol.* **2022**, *161*, 113340.
